# Supplementary material for: Is a Persistent Global Bias Necessary for the Establishment of Planar Cell Polarity?
Source: PubMed Central journal article supplement (PMC3620226; doi:10.1371/journal.pone.0060064), 2013-04-08
Supplement: pone.0060064.s007.pdf [file pone.0060064.s007.pdf]

|       |                                             |
|-------|---------------------------------------------|
| $K_b$ | 20                                          |
| $K_p$ | $K_p$                                       |
| $\mu$ | $m \cdot (0.1, 0.1, 0.1, 0.1, 0.0001, 0.1)$ |
