# Supplementary material for: Is a Persistent Global Bias Necessary for the Establishment of Planar Cell Polarity?
Source: PubMed Central journal article supplement (PMC3620226; doi:10.1371/journal.pone.0060064), 2013-04-08
Supplement: pone.0060064.s008.pdf [file pone.0060064.s008.pdf]

|           |                                                     |
|-----------|-----------------------------------------------------|
| $K_{pk}$  | 0.5                                                 |
| $K_{va}$  | 0.5                                                 |
| $K_b$     | 500                                                 |
| $K_p$     | 5                                                   |
| $\mu$     | (100, 100, 0.1, 0.1, 0.01, 0.1, 0.1, 0.1, 0.1, 0.1) |
| $\lambda$ | (50, 25, 0.001, 25, 50, 25, 25, 50, 25, 25)         |
| $R$       | (100, 50, 1000, 50, 100, 50, 50, 100, 50, 50)       |
