# Supplementary material for: Is a Persistent Global Bias Necessary for the Establishment of Planar Cell Polarity?
Source: PubMed Central journal article supplement (PMC3620226; doi:10.1371/journal.pone.0060064), 2013-04-08
Supplement: pone.0060064.s009.pdf [file pone.0060064.s009.pdf]

|       |                                                            |
|-------|------------------------------------------------------------|
| $A_3$ | 1.5                                                        |
| $A_5$ | 1.5                                                        |
| $A_8$ | 1.5                                                        |
| $B_3$ | 3                                                          |
| $B_5$ | 3                                                          |
| $B_8$ | 3                                                          |
| $Kf$  | (0.01, 0.01, 0.01, 0.015, 0.03, 0.03, 0.003, 0.003)        |
| $Kd$  | (0, 0.04, 0.04, 0.04, 0.001, 0.001, 0.0005, 0.0005)        |
| $\mu$ | 1.27(0.02, 0.02, 0.02, 0.02, 0.02, 0.02, 0.02, 0.02, 0.02) |
