# Supplementary material for: Is a Persistent Global Bias Necessary for the Establishment of Planar Cell Polarity?
Source: PubMed Central journal article supplement (PMC3620226; doi:10.1371/journal.pone.0060064), 2013-04-08
Supplement: pone.0060064.s010.pdf [file pone.0060064.s010.pdf]

|           |                                                                             |
|-----------|-----------------------------------------------------------------------------|
| $A_3$     | 3.3885                                                                      |
| $A_5$     | 8.5385                                                                      |
| $A_8$     | 0.8                                                                         |
| $B_3$     | 6.0579                                                                      |
| $B_5$     | 10.8                                                                        |
| $B_8$     | 0.5385                                                                      |
| $Kf$      | (10.3185, 5.5385, 6.0385, 2.3535,<br>13.5095, 1.8358, 10.5385, 11.3882)     |
| $Kd$      | (0, 0.9965, 1.1021, 1.4912,<br>0.6353, 0.4319, 2.7598, 0.4319)              |
| $\mu$     | (0.0625, 0.0625, 0.0019, 0.0625,<br>0.1250, 0.0625, 0.0625, 0.1250, 0.0019) |
| $\lambda$ | 0.0081                                                                      |
