# Supplementary material for: Is a Persistent Global Bias Necessary for the Establishment of Planar Cell Polarity?
Source: PubMed Central journal article supplement (PMC3620226; doi:10.1371/journal.pone.0060064), 2013-04-08
Supplement: pone.0060064.s011.pdf [file pone.0060064.s011.pdf]

|      | left    | right   |
|------|---------|---------|
| Ld   | –       | 0       |
| Fz   | –       | 0       |
| Fz*  | -0.0065 | 0.0065  |
| Fmi  | –       | -0.0575 |
| Vang | –       | -0.299  |
| Dsh  | –       | 0.0444  |
| Pk   | –       | -0.0509 |

|                  | left    | right   |
|------------------|---------|---------|
| Fz*Fmi           | -0.0277 | 0.0277  |
| FmiVang          | -0.0433 | 0.0433  |
| Fz*FmiFmiVang    | 0.0116  | -0.0116 |
| Dsh*FzFmiFmiVang | 0.0430  | -0.0430 |
| Fz*FmiFmiVaPk    | 0.1496  | -0.1496 |
| Dsh*FzFmiFmiVaPk | 0.6845  | -0.6845 |
