# Supplementary material for: Is a Persistent Global Bias Necessary for the Establishment of Planar Cell Polarity?
Source: PubMed Central journal article supplement (PMC3620226; doi:10.1371/journal.pone.0060064), 2013-04-08
Supplement: pone.0060064.s012.pdf [file pone.0060064.s012.pdf]

|       |                                                                                    |
|-------|------------------------------------------------------------------------------------|
| $A_3$ | $3.3885F$                                                                          |
| $A_5$ | $8.5385F$                                                                          |
| $A_8$ | $0.8F$                                                                             |
| $B_3$ | $6.0579F$                                                                          |
| $B_5$ | $10.8F$                                                                            |
| $B_8$ | $0.5385F$                                                                          |
| $\mu$ | $D \cdot (0.0625, 0.0625, 0.0019, 0.0625, 0.1250, 0.0625, 0.0625, 0.1250, 0.0019)$ |
