# Supplementary material for: Is a Persistent Global Bias Necessary for the Establishment of Planar Cell Polarity?
Source: PubMed Central journal article supplement (PMC3620226; doi:10.1371/journal.pone.0060064), 2013-04-08
Supplement: pone.0060064.s013.pdf [file pone.0060064.s013.pdf]

|       |                                                                              |
|-------|------------------------------------------------------------------------------|
| $A_3$ | 2.9577                                                                       |
| $A_5$ | 8.1077                                                                       |
| $A_8$ | 0.3692                                                                       |
| $B_3$ | 5.6271                                                                       |
| $B_5$ | 10.3692                                                                      |
| $B_8$ | 0.1077                                                                       |
| $Kf$  | (858.8877, 398.1077, 86.6077, 57.9227, 12.3716, 1.405, 10.1077, 10.9574)     |
| $Kd$  | (0, 0.5657, 0.6713, 0.3533, 0.2045, 0.001114, 0.9148, 0.001177)              |
| $\mu$ | 4 · (0.7519, 0.4829, 0.1695, 0.7507, 2.6369, 1.4969, 1.5244, 2.4982, 0.0269) |
